# Supplementary material
Source: publisher site journal article supplement (https://www.dovepress.com/article/270698)

**Table S1** Traditional Chinese Medicine Pattern Differentiation.

| **Diagnostic patterns** | **Items** |
| --- | --- |
| **Stagnation of Qi and blood** | Pain: distended, stabbing abdominal pain before or during the period aggravated by pressure.  Menstruation: dark purplish in color, clotty and hesitant or scanty in flow, pain relieved after clots discharged.  Accompanying symptoms: distending in breasts, mood swings. Tongue: purplish.  Pulse: wiry. |
| **Retention of cold-damp coagulation** | Pain: distended, stabbing abdominal pain before or during the period, favorably to warmth, lower back pain.  Menstruation: dark purplish in color, clotty and hesitant in flow, pain relieved after clots discharged.  Accompanying symptoms: distending in breasts, mood swings, and aversion to cold.  Tongue: pale and white greasy tongue coating.  Pulse: deep and slow. |


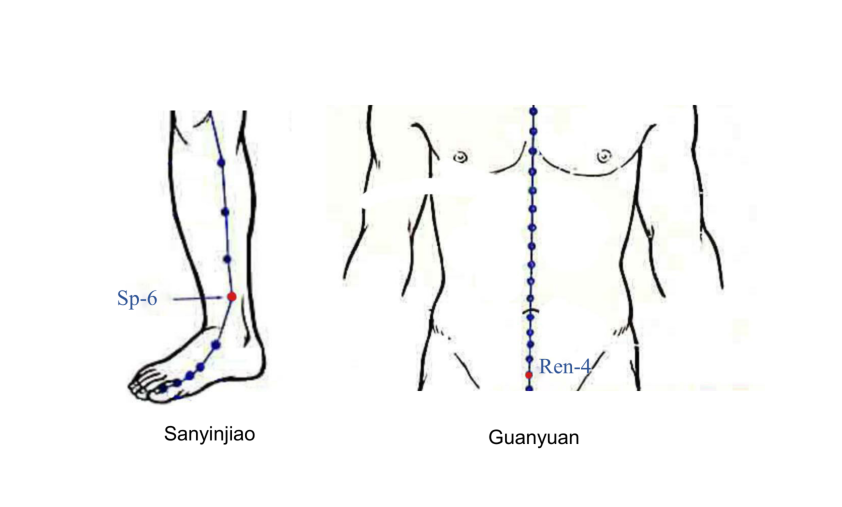


**Supplementary Figure 1:** Location of Sanyinjiao and Guanyuan.


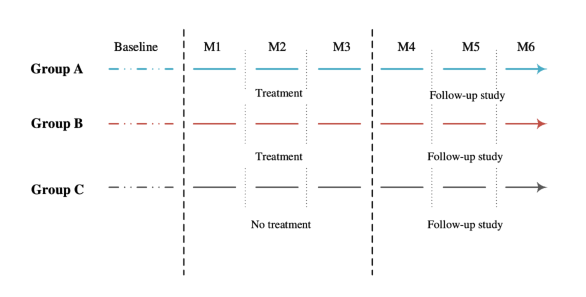


**Supplementary Figure 2:** Timeline of Baseline, Treatment, and Follow-up. For Group A and Group B, the treatment course took 3 months (M1–M3). After the completion of treatment, there was a 3-month follow-up stage (M4–M6). Group C, the waiting-list group, received no treatment over 3 months (M1–M3).

**Supplement 1**: Protocol for this study.


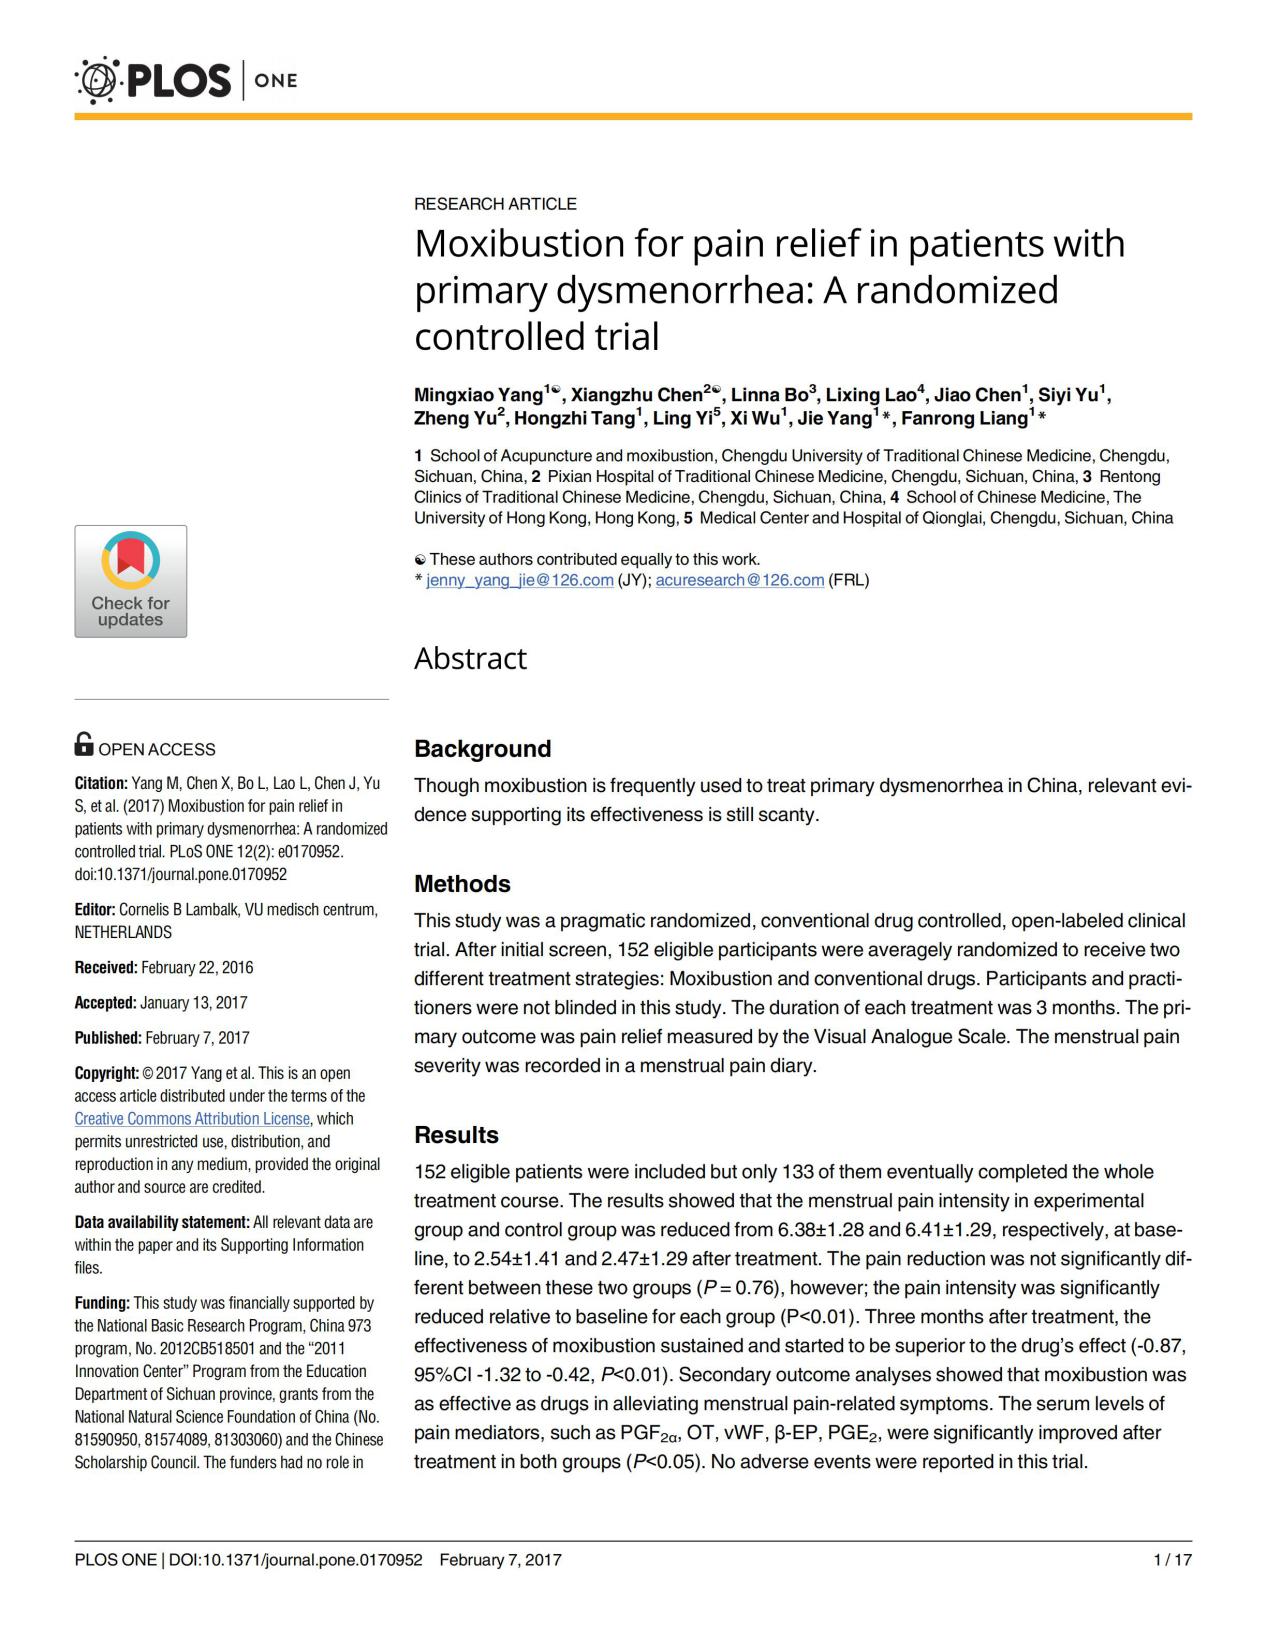

Supplement: Supplementary file 1 [file get_supplementary_file.php]
